# Supplementary figures and images for: Estimating intraspecific genetic diversity from community DNA metabarcoding data
Source: PeerJ journal article supplement (doi:10.7717/peerj.4644), 2018-04-09

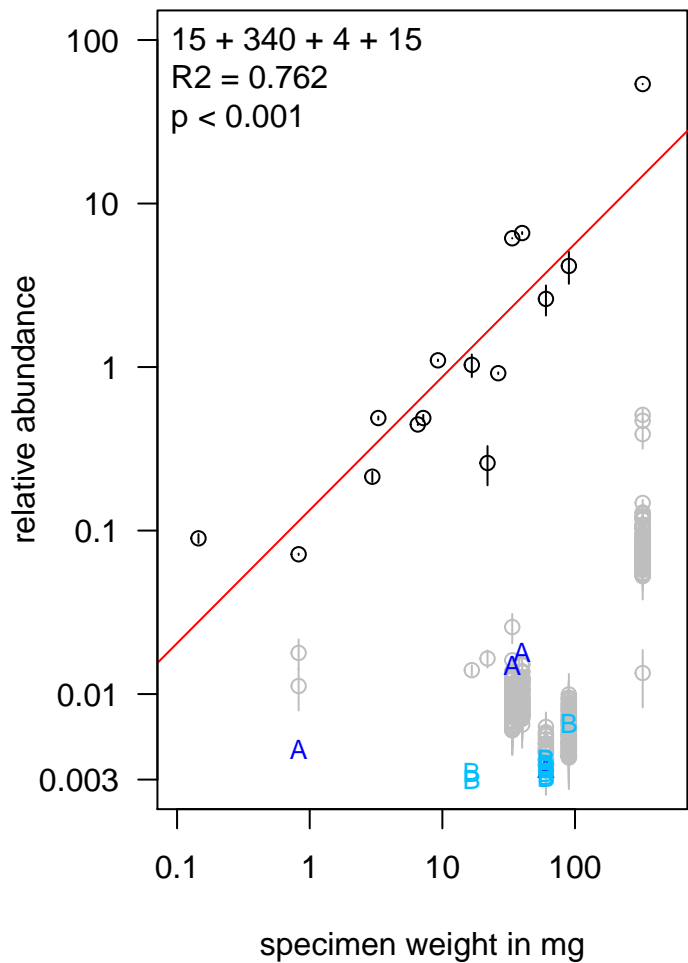

Supplement: Scripts_S1_v3.zip [file Scripts_S1_v3.zip]

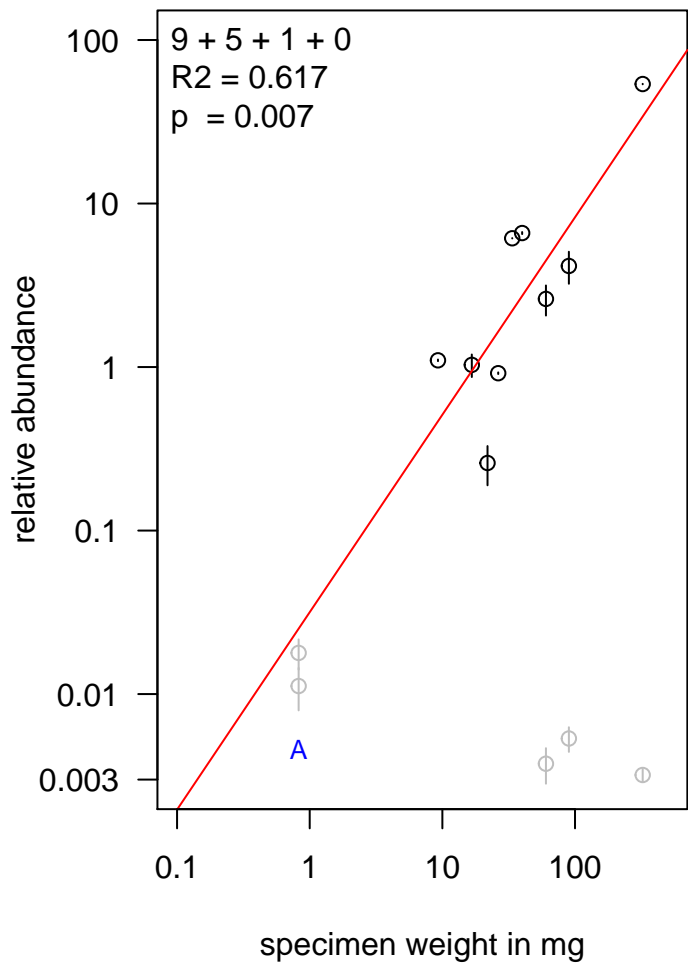

Supplement: Scripts_S1_v3.zip [file Scripts_S1_v3.zip]

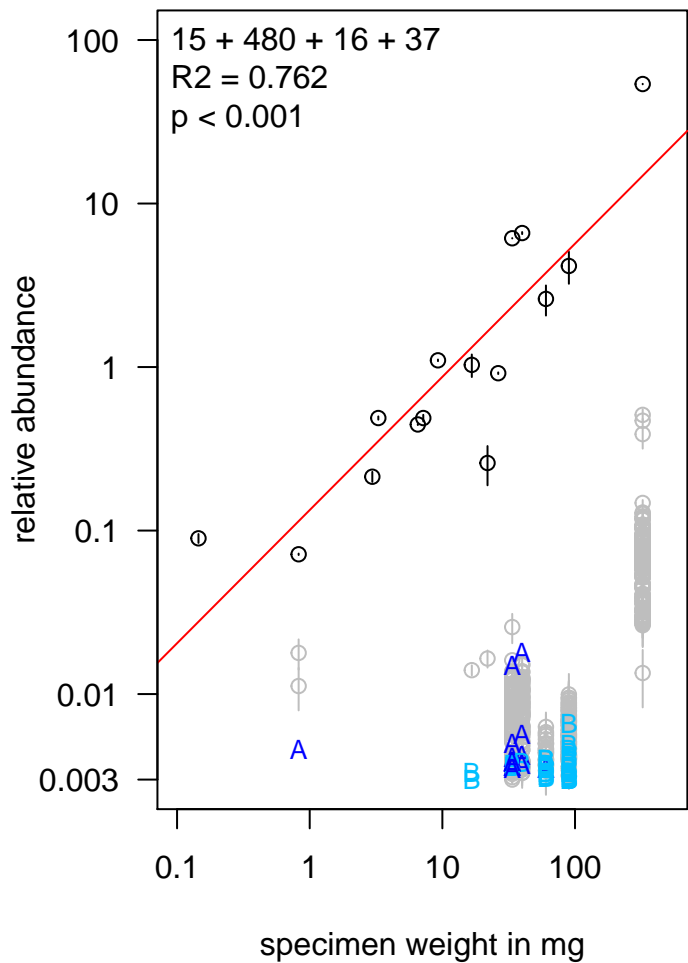

Supplement: Scripts_S1_v3.zip [file Scripts_S1_v3.zip]

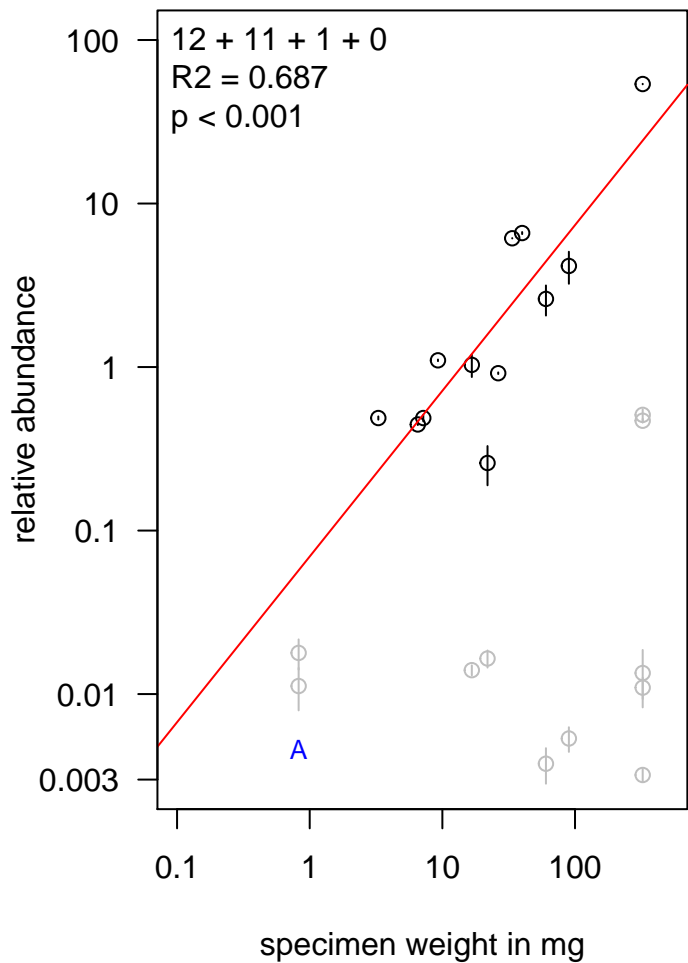

Supplement: Scripts_S1_v3.zip [file Scripts_S1_v3.zip]

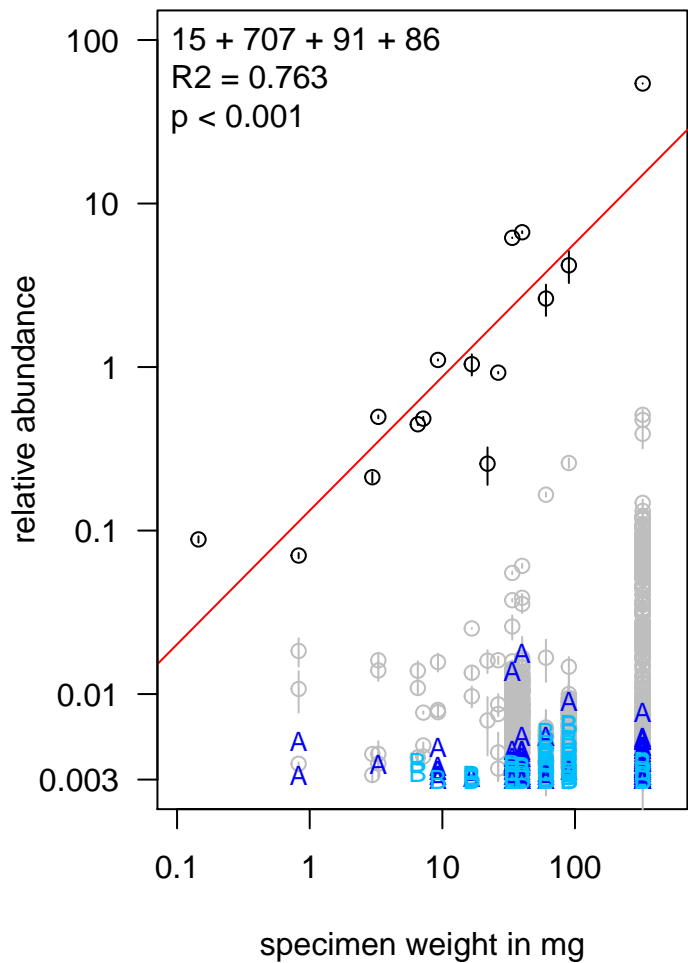

Supplement: Scripts_S1_v3.zip [file Scripts_S1_v3.zip]

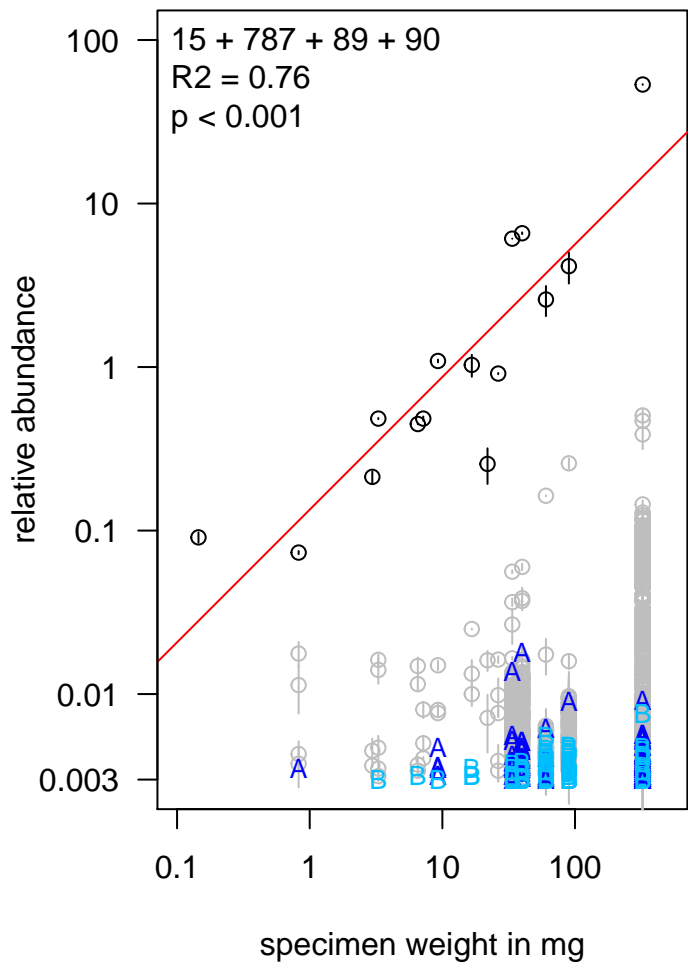

Supplement: Scripts_S1_v3.zip [file Scripts_S1_v3.zip]

color\_guide

|    |              |                                                                                   |
|----|--------------|-----------------------------------------------------------------------------------|
| 1  | #E41A1C      |  |
| 2  | #377EB8      |  |
| 3  | #4DAF4A      |  |
| 4  | #984EA3      |  |
| 5  | #FF7F00      |  |
| 6  | #FFFF33      |  |
| 7  | #A65628      |  |
| 8  | #F781BF      |  |
| 9  | #999999      |  |
| 10 | lightskyblue |  |
| 11 | white        |  |

Supplement: Scripts_S1_v3.zip [file Scripts_S1_v3.zip]

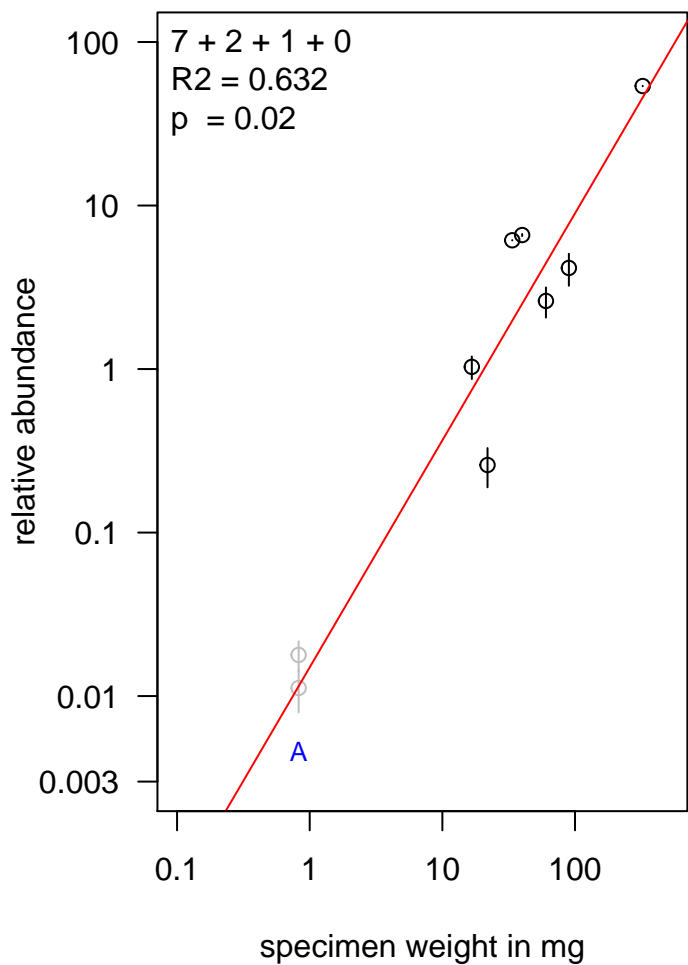

Supplement: Scripts_S1_v3.zip [file Scripts_S1_v3.zip]

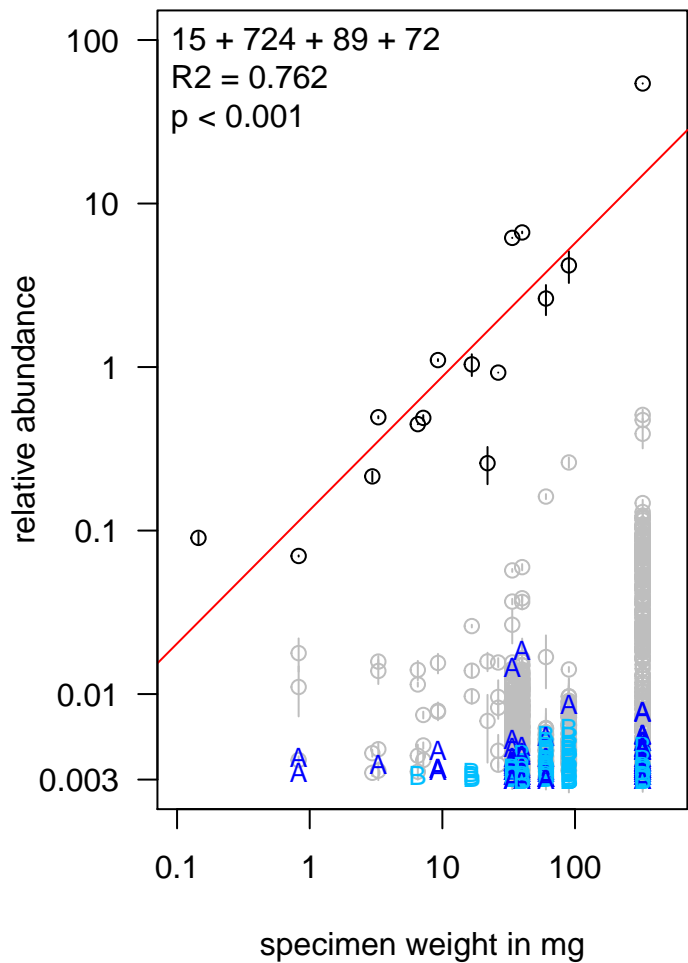

Supplement: Scripts_S1_v3.zip [file Scripts_S1_v3.zip]

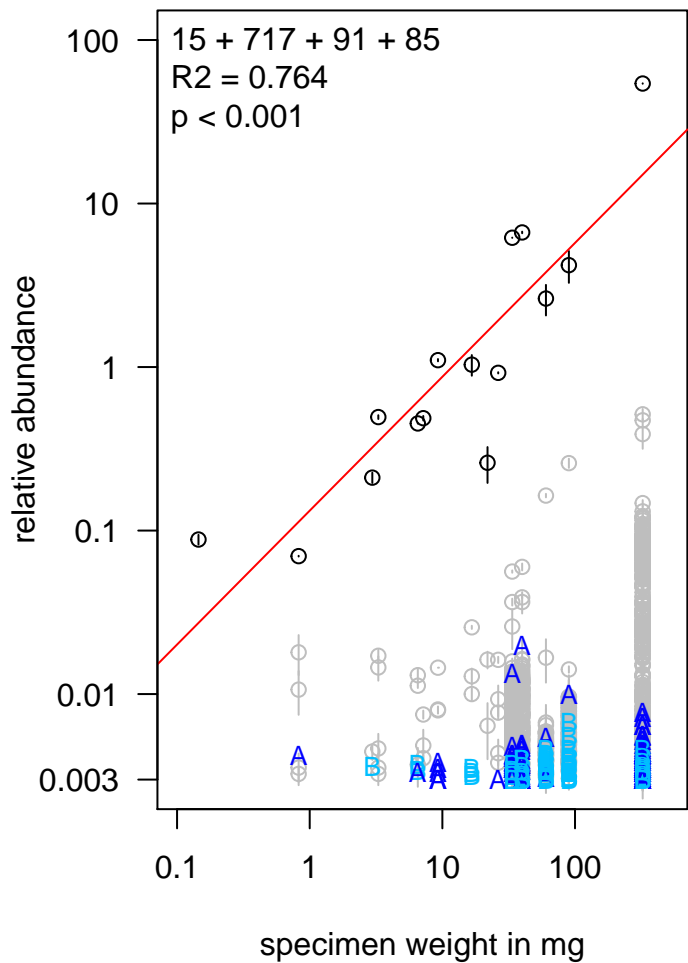

Supplement: Scripts_S1_v3.zip [file Scripts_S1_v3.zip]

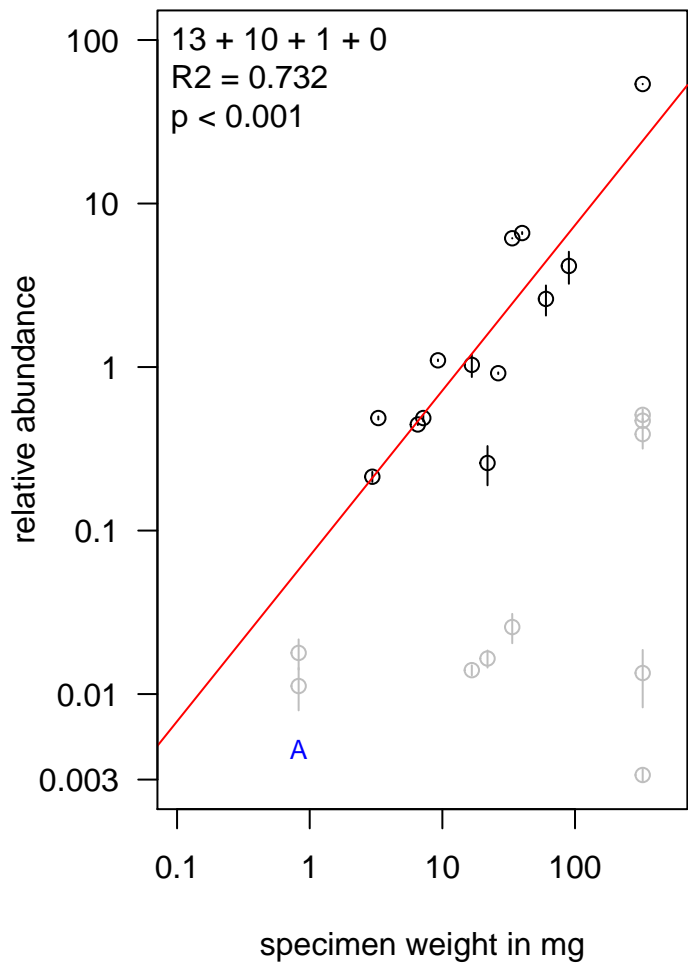

Supplement: Scripts_S1_v3.zip [file Scripts_S1_v3.zip]

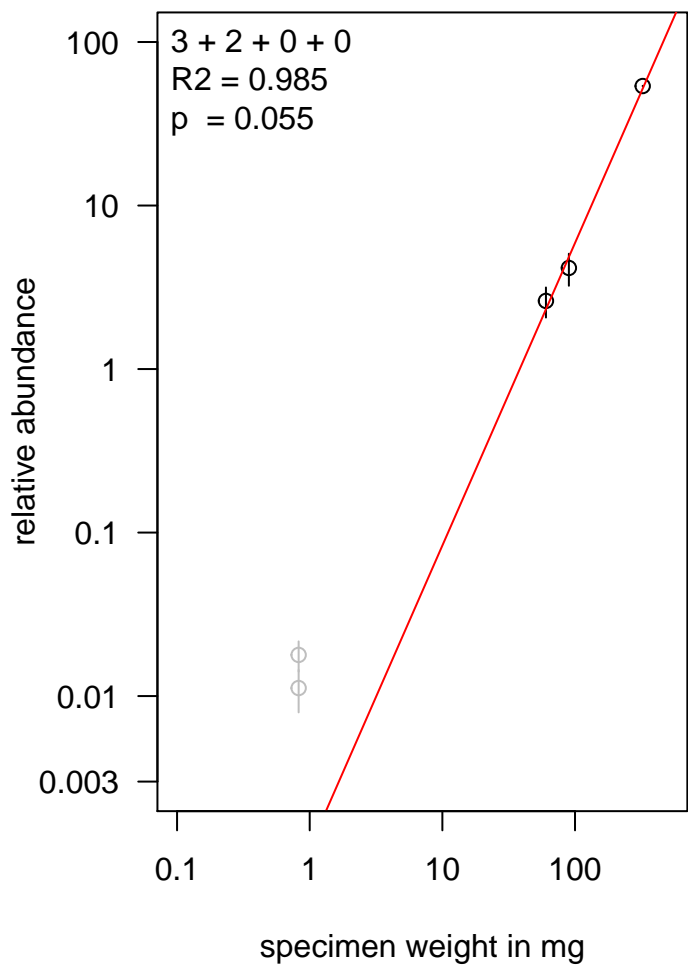

Supplement: Scripts_S1_v3.zip [file Scripts_S1_v3.zip]

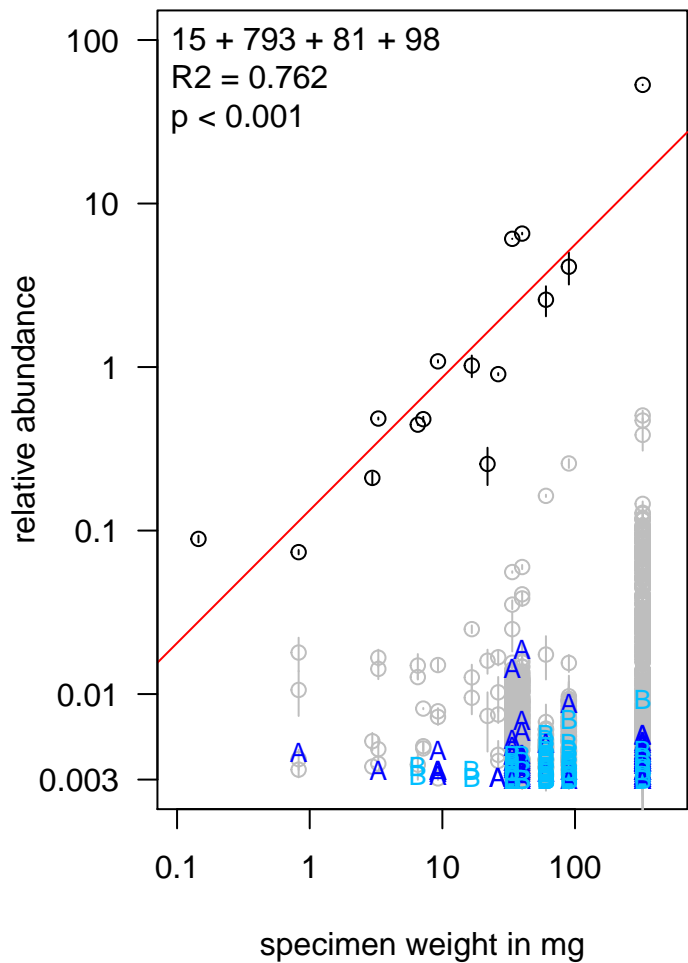

Supplement: Scripts_S1_v3.zip [file Scripts_S1_v3.zip]

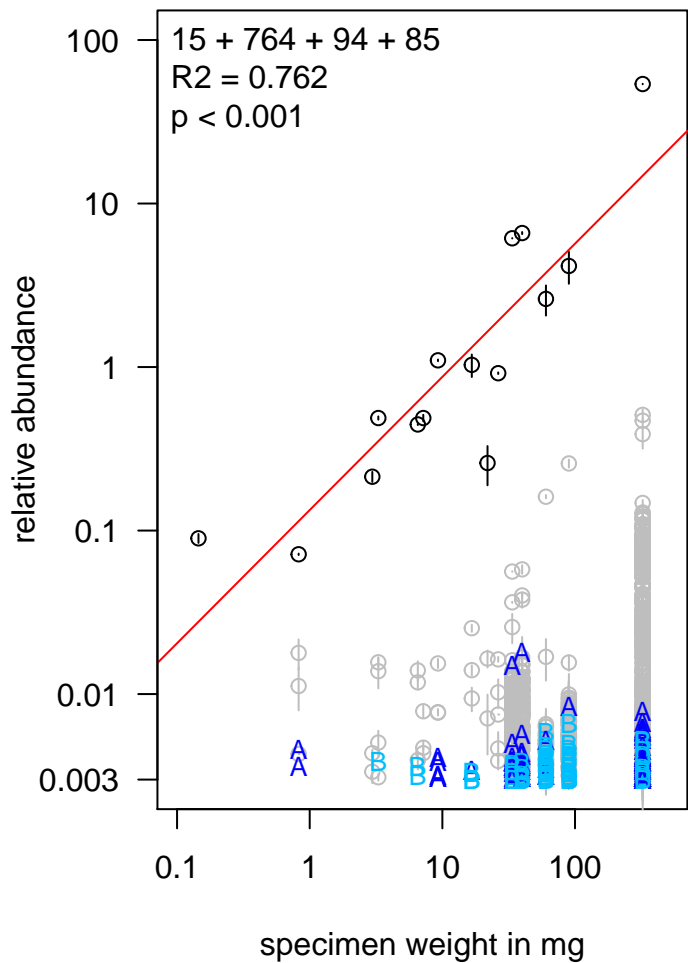

Supplement: Scripts_S1_v3.zip [file Scripts_S1_v3.zip]

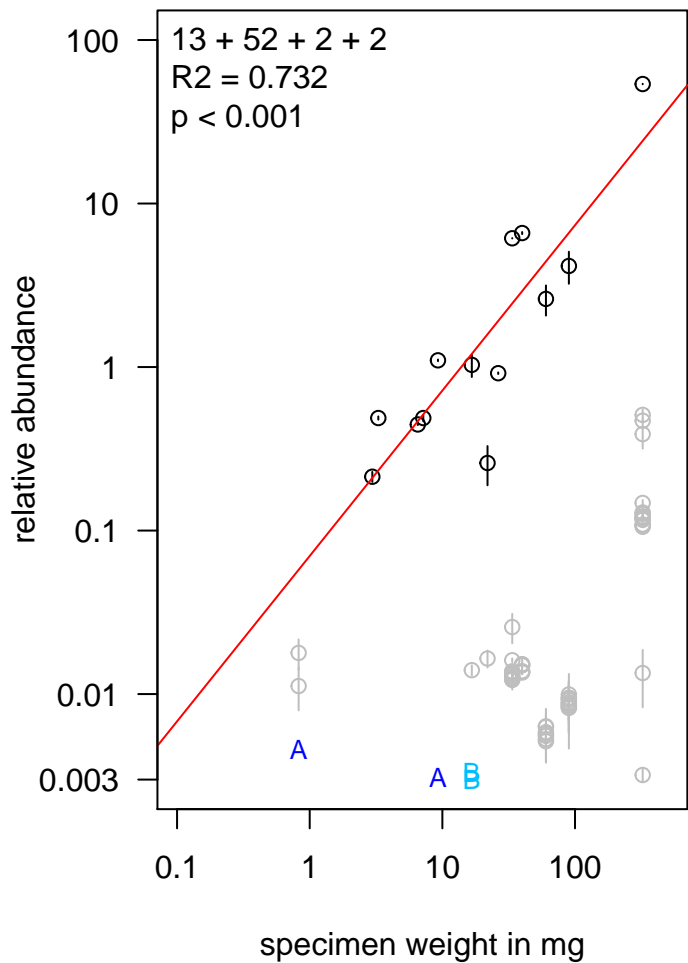

Supplement: Scripts_S1_v3.zip [file Scripts_S1_v3.zip]

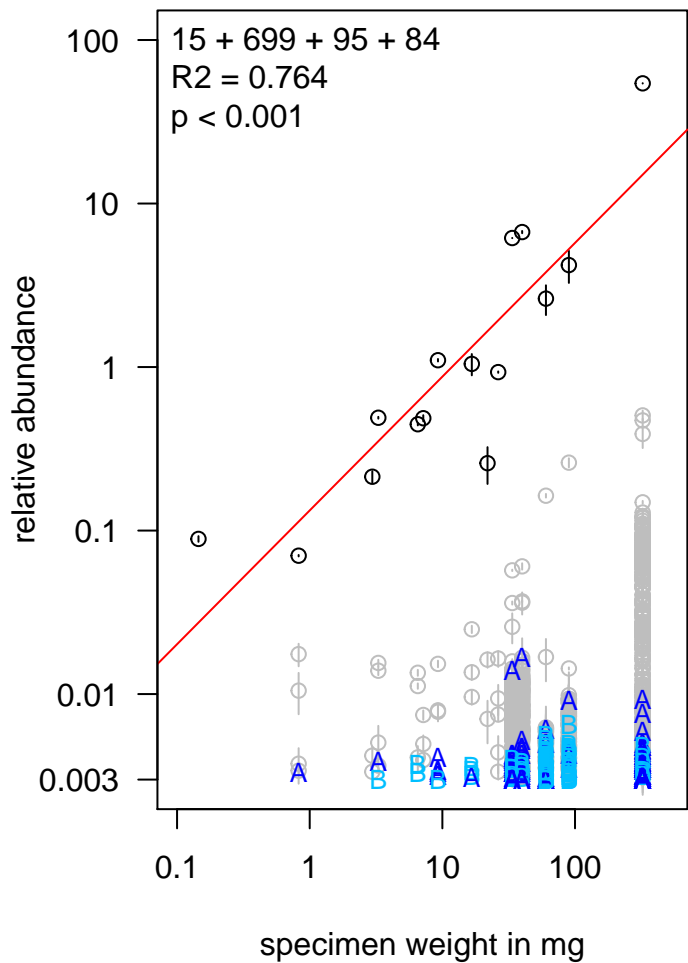

Supplement: Scripts_S1_v3.zip [file Scripts_S1_v3.zip]

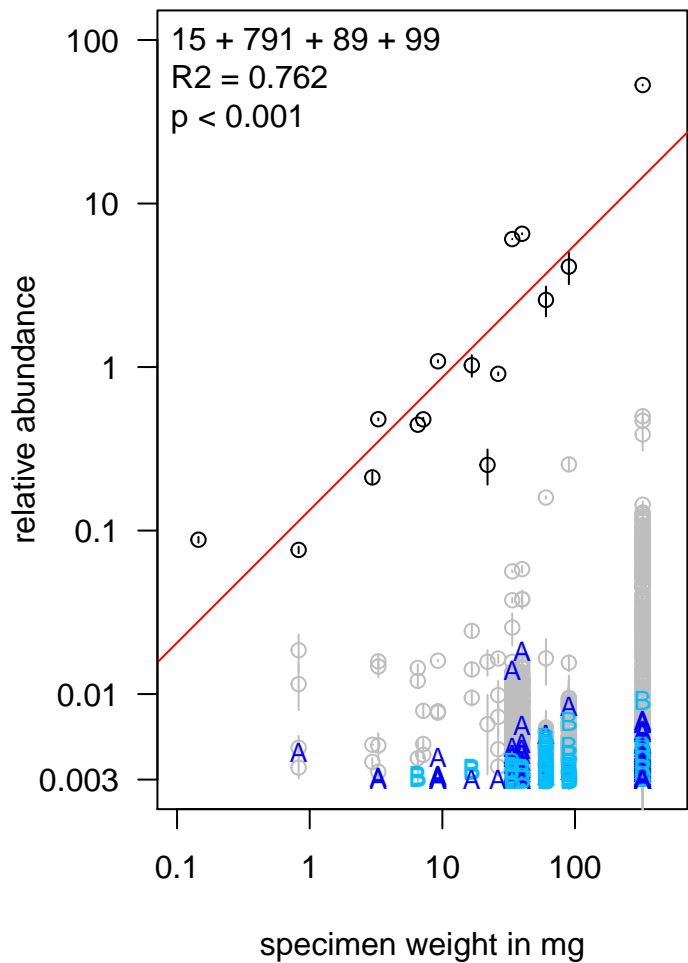

Supplement: Scripts_S1_v3.zip [file Scripts_S1_v3.zip]
